# Supplementary material
Source: PubMed Central journal article supplement (PMC4392343)
Supplement: NIHMS670609-supplement.pdf [file NIHMS670609-supplement.pdf]

**Figure S1**

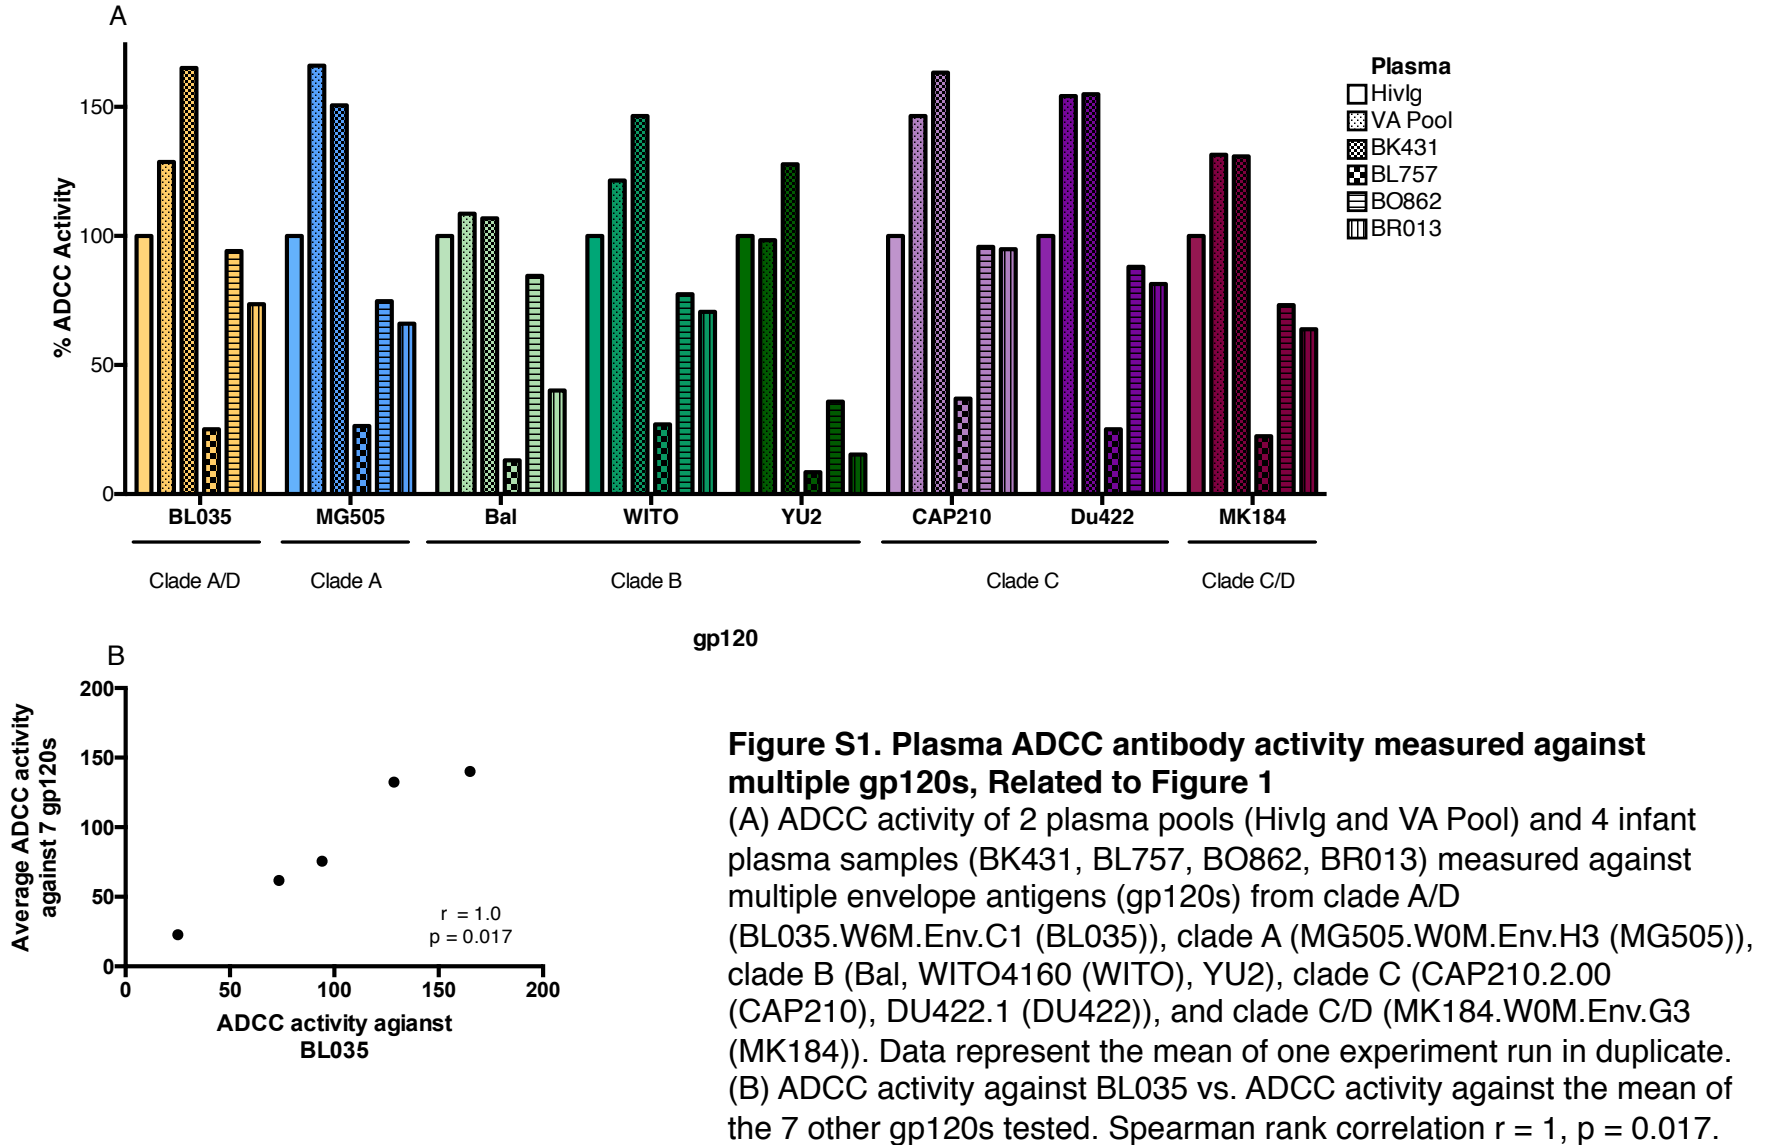

Figure S2

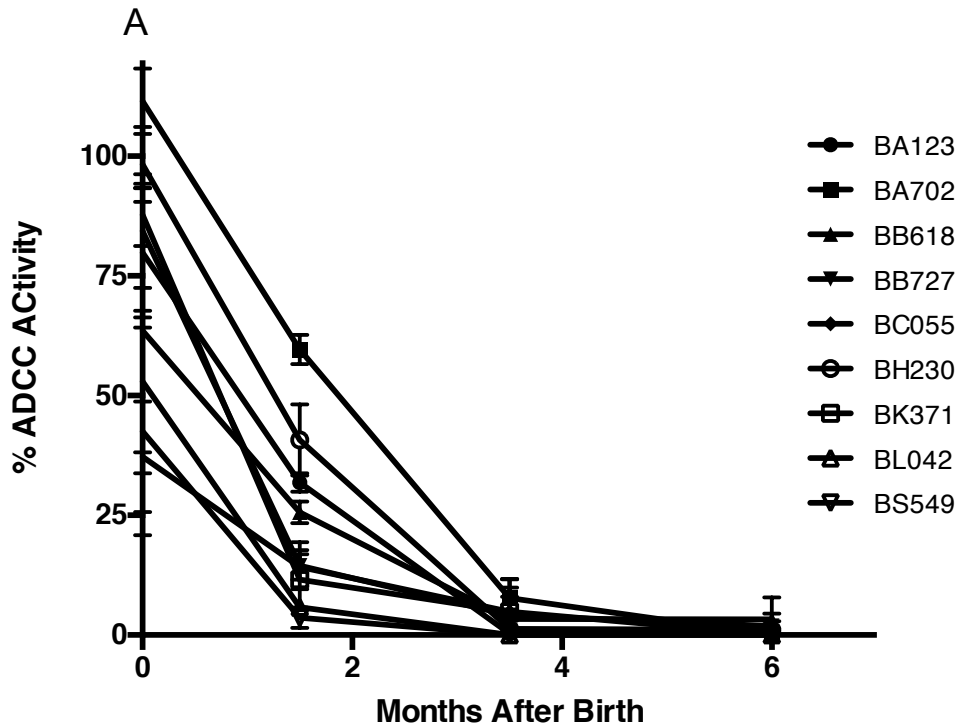

**Figure S2. Decay of passively acquired ADCC activity in HIV-uninfected infants, Related to Figure 1**

(A) ADCC activity measured in longitudinal plasma samples from nine HIV-uninfected infants, with each infant shown as a line with the indicated symbol at the right. Data represent the mean  $\pm$  SD of two independent experiments run in duplicate. (B) Passively acquired infant ADCC responses are shown in relation to infection outcome for a subset of infected infants that were first detected as HIV-infected by 6 weeks of age (during which time passively acquired antibodies have their highest activity). Results are normalized to a positive control (HivIg) and data are represented as mean  $\pm$  SEM.

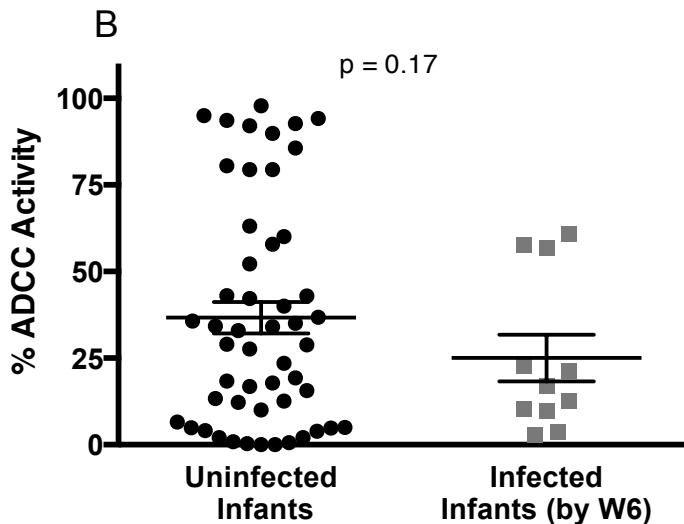

Figure S3

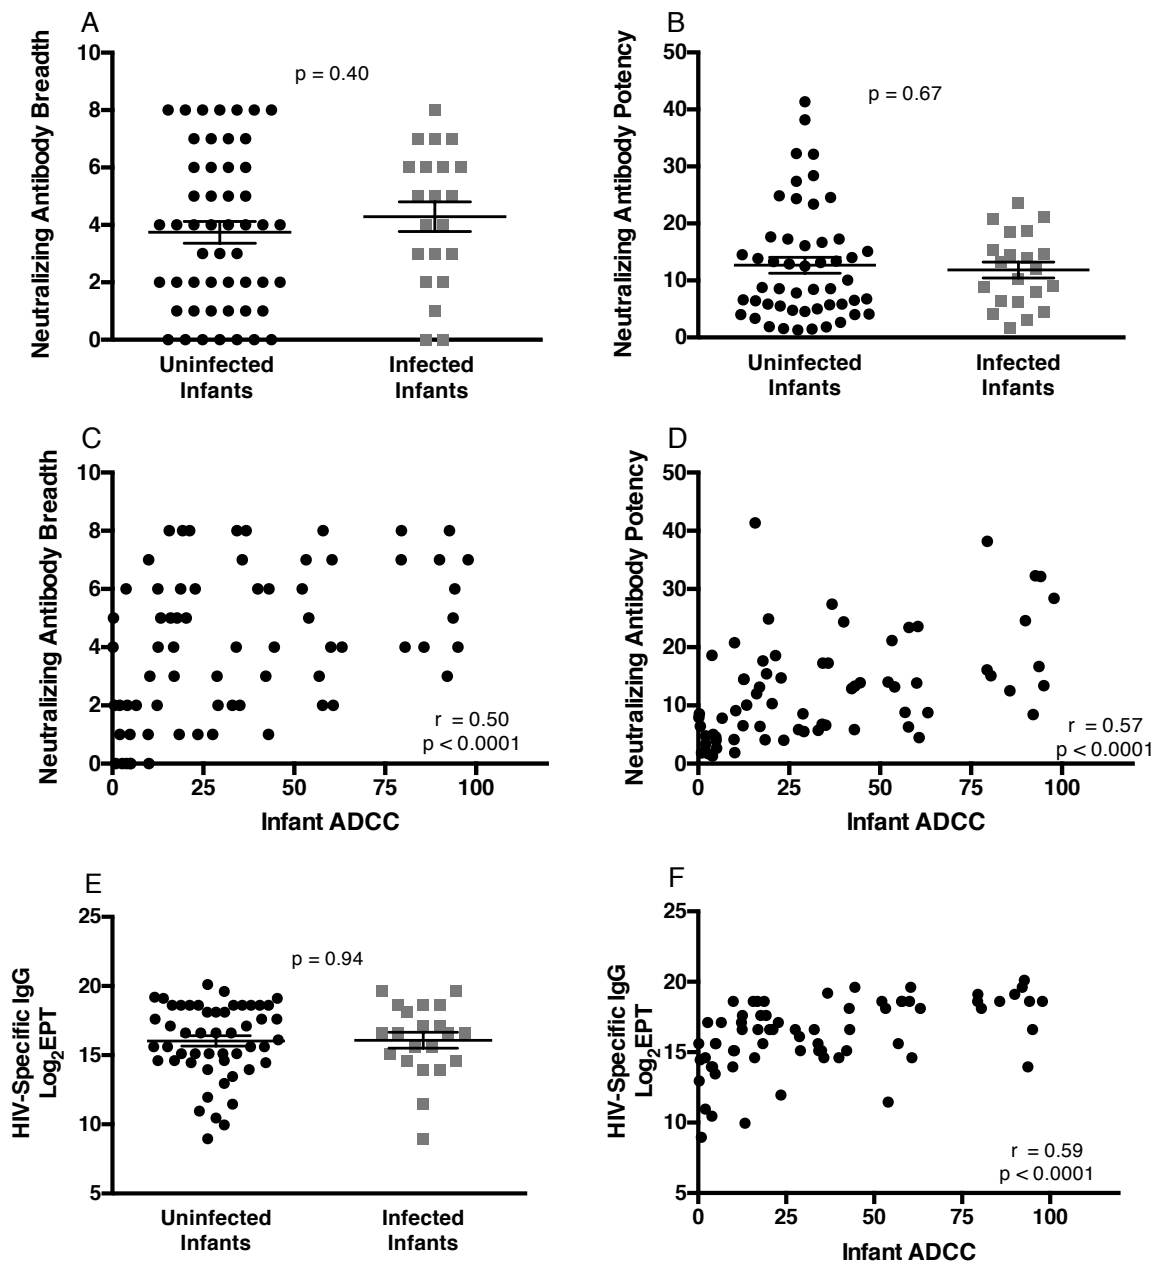

**Figure S3. Neutralizing Antibody Responses and Total HIV-specific Binding Titers in Infants, Related to Figure 1** Infant plasma-mediated neutralizing antibody breadth (A), neutralizing antibody potency (B) and HIV-specific IgG  $\text{log}_2\text{EPT}$  (E) in relation to infant infection status. Data are represented as mean  $\pm$  SEM. Correlation between infant ADCC antibody activity and neutralizing antibody breadth (C), neutralizing antibody potency (D) and HIV-specific  $\text{log}_2\text{EPT}$  (F).
